# Supplementary material for: Traditional East Asian Herbal Medicine for Post-Stroke Insomnia: A Systematic Review and Meta-Analysis of Randomized Controlled Trials
Source: MDPI journal article supplement (doi:10.3390/ijerph19031754), 2022-02-03
Supplement: s1 [file s1]

**Table S2.** Search terms used in each database**Medline via PubMed**

|    | Searches                                                                                                                                                                                                                                                                                                                                                                                                                             | Results   |
|----|--------------------------------------------------------------------------------------------------------------------------------------------------------------------------------------------------------------------------------------------------------------------------------------------------------------------------------------------------------------------------------------------------------------------------------------|-----------|
| #1 | "Sleep"[MH] OR "sleep wake disorders"[MH] OR sleep* OR insomnia* OR wakeful* OR sleepless* OR dyssomn*                                                                                                                                                                                                                                                                                                                               | 273824    |
| #2 | "stroke"[MH] OR stroke                                                                                                                                                                                                                                                                                                                                                                                                               | 375208    |
| #3 | "Plants, Medicinal"[MH] OR "Drugs, Chinese Herbal"[MH] OR "Medicine, Chinese Traditional"[MH] OR "Medicine, Kampo"[MH] OR "Medicine, Korean Traditional"[MH] OR "Herbal Medicine"[MH] OR "Prescription Drugs"[MH] OR "traditional Korean medicine" OR "traditional Chinese medicine" OR "Traditional oriental medicine" OR "Kampo medicine" OR "alternative medicine" OR "complementary medicine" OR herb* OR decoction* OR botanic* | 364699    |
| #4 | #1 AND #2 AND #3                                                                                                                                                                                                                                                                                                                                                                                                                     | <b>84</b> |

**EMBASE via Elsevier**

|    | Searches                                                                                                                                                                                                                                                                                                                                                                                                                                                                                                                                                                                   | Results    |
|----|--------------------------------------------------------------------------------------------------------------------------------------------------------------------------------------------------------------------------------------------------------------------------------------------------------------------------------------------------------------------------------------------------------------------------------------------------------------------------------------------------------------------------------------------------------------------------------------------|------------|
| #1 | 'Sleep'/exp OR 'sleep' OR 'sleep disorder'/exp OR 'sleep disorder' OR 'insomnia*' OR 'wakeful*' OR 'sleepless*' OR 'dyssomn*'                                                                                                                                                                                                                                                                                                                                                                                                                                                              | 496155     |
| #2 | 'cerebrovascular disease'/exp OR 'cerebrovascular disease'                                                                                                                                                                                                                                                                                                                                                                                                                                                                                                                                 | 791840     |
| #3 | 'stroke patient'/exp OR 'stroke patient'                                                                                                                                                                                                                                                                                                                                                                                                                                                                                                                                                   | 37590      |
| #4 | 'Stroke'                                                                                                                                                                                                                                                                                                                                                                                                                                                                                                                                                                                   | 493085     |
| #5 | 'medicinal plant'/exp OR 'medicinal plant' OR 'herbaceous agent'/exp OR 'herbaceous agent' OR 'chinese medicine'/exp OR 'chinese medicine' OR 'kampo medicine'/exp OR 'kampo medicine' OR 'kampo medicine (drug)'/exp OR 'kampo medicine (drug)' OR 'korean medicine'/exp OR 'korean medicine' OR 'herbal medicine'/exp OR 'herbal medicine' OR 'prescription drug'/exp OR 'prescription drug' OR 'oriental medicine'/exp OR 'oriental medicine' OR 'alternative medicine'/exp OR 'alternative medicine' OR 'complementary medicine' OR 'herb'/exp OR 'herb' OR 'decoction*' OR 'botanic*' | 614933     |
| #7 | #1 AND (#2 OR #3 OR #4) AND #5                                                                                                                                                                                                                                                                                                                                                                                                                                                                                                                                                             | <b>646</b> |

**CENTRAL**

|     | Searches                                                                                                                                                            | Results |
|-----|---------------------------------------------------------------------------------------------------------------------------------------------------------------------|---------|
| #1  | MeSH descriptor: [Sleep] explode all trees                                                                                                                          | 5900    |
| #2  | MeSH descriptor: [Sleep wake disorders] explode all trees                                                                                                           | 8521    |
| #3  | sleep* OR insomnia* OR wakeful* OR sleepless* OR dyssomn*                                                                                                           | 51134   |
| #4  | #1 OR #2 OR #3                                                                                                                                                      | 51417   |
| #5  | MeSH descriptor: [Stroke] explode all trees                                                                                                                         | 10417   |
| #6  | (stroke):ti,ab,kw                                                                                                                                                   | 57872   |
| #7  | #5 OR #6                                                                                                                                                            | 58304   |
| #8  | (#1 OR #2 OR #3) AND (#5 OR #6)                                                                                                                                     | 1050    |
| #9  | MeSH descriptor: [Plants, Medicinal] explode all trees                                                                                                              | 946     |
| #10 | MeSH descriptor: [Drugs, Chinese Herbal] explode all trees                                                                                                          | 3665    |
| #11 | MeSH descriptor: [Medicine, Chinese Traditional] explode all trees                                                                                                  | 1222    |
| #12 | MeSH descriptor: [Medicine, Kampo] explode all trees                                                                                                                | 46      |
| #13 | MeSH descriptor: [Medicine, Korean Traditional] explode all trees                                                                                                   | 33      |
| #14 | MeSH descriptor: [Herbal Medicine] explode all trees                                                                                                                | 63      |
| #15 | MeSH descriptor: [Prescription Drugs] explode all trees                                                                                                             | 108     |
| #16 | traditional Korean medicine OR traditional Chinese medicine OR Traditional oriental medicine OR Kampo medicine OR alternative medicine OR complementary medicine OR | 51216   |

|     |                                                     |           |
|-----|-----------------------------------------------------|-----------|
|     | herb* OR decoction* OR botanic*                     |           |
| #17 | #9 OR #10 OR #11 OR #12 OR #13 OR #14 OR #15 OR #16 | 52098     |
| #18 | #8 AND #17                                          | <b>79</b> |

#### AMED via EBSCO

|    | Searches                                                                                                                                                                                                                                | Results   |
|----|-----------------------------------------------------------------------------------------------------------------------------------------------------------------------------------------------------------------------------------------|-----------|
| #1 | Sleep[SU] OR sleep wake disorders[SU] OR sleep*[TX] OR insomnia*[TX] OR wakeful*[TX] OR sleepless*[TX] OR dyssomn*[TX]                                                                                                                  | 3         |
| #2 | stroke[SU]                                                                                                                                                                                                                              | 37        |
| #3 | stroke[TX]                                                                                                                                                                                                                              | 2         |
| #4 | Plants, Medicinal[SU] OR Drugs, Chinese Herbal[SU] OR Medicine, Chinese Traditional[SU] OR Medicine, Kampo[SU] OR Medicine, Korean Traditional[SU] OR Herbal Medicine[SU] OR Prescription Drugs[SU]                                     | 478       |
| #5 | traditional Korean medicine[TX] OR traditional Chinese medicine[TX] OR Traditional oriental medicine[TX] OR Kampo medicine[TX] OR alternative medicine[TX] OR complementary medicine[TX] OR herb*[TX] OR decoction*[TX] OR botanic*[TX] | 26        |
| #6 | #1 AND ( #2 OR #3) AND (#4 OR #5)                                                                                                                                                                                                       | <b>22</b> |

#### CINAHL via EBSCO

|    | Searches                                                                                                                                                                                                                                | Results    |
|----|-----------------------------------------------------------------------------------------------------------------------------------------------------------------------------------------------------------------------------------------|------------|
| #1 | Sleep[SU] OR sleep wake disorders[SU] OR sleep*[TX] OR insomnia*[TX] OR wakeful*[TX] OR sleepless*[TX] OR dyssomn*[TX]                                                                                                                  | 42         |
| #2 | stroke[SU]                                                                                                                                                                                                                              | 672        |
| #3 | stroke[TX]                                                                                                                                                                                                                              | 72         |
| #4 | Plants, Medicinal[SU] OR Drugs, Chinese Herbal[SU] OR Medicine, Chinese Traditional[SU] OR Medicine, Kampo[SU] OR Medicine, Korean Traditional[SU] OR Herbal Medicine[SU] OR Prescription Drugs[SU]                                     | 363        |
| #5 | traditional Korean medicine[TX] OR traditional Chinese medicine[TX] OR Traditional oriental medicine[TX] OR Kampo medicine[TX] OR alternative medicine[TX] OR complementary medicine[TX] OR herb*[TX] OR decoction*[TX] OR botanic*[TX] | 38         |
| #6 | #1 AND ( #2 OR #3) AND (#4 OR #5)                                                                                                                                                                                                       | <b>334</b> |

#### PsycARTICLES via ProQuest

|    | Searches                                                                                                                                                                                                              | Results    |
|----|-----------------------------------------------------------------------------------------------------------------------------------------------------------------------------------------------------------------------|------------|
| #1 | Exact("sleep wake disorders")                                                                                                                                                                                         | 228        |
| #2 | Exact("sleep")                                                                                                                                                                                                        | 935        |
| #3 | SU(Sleep) OR SU(sleep wake disorders) OR 'sleep*' OR 'insomnia*' OR 'wakeful*' OR 'sleepless*' OR 'dyssomn*'                                                                                                          | 17586      |
| #4 | Exact("stroke")                                                                                                                                                                                                       | 124        |
| #5 | Stroke                                                                                                                                                                                                                | 6261       |
| #6 | Exact("drugs, chinese herbal") OR "plants, medicinal" OR "prescription drugs" OR "medicine, chinese traditional" OR "alternative medicine" OR "medicinal herbs and plants"                                            | 155        |
| #7 | 'traditional Korean medicine' OR 'traditional Chinese medicine' OR 'Traditional oriental medicine' OR 'Kampo medicine' OR 'alternative medicine' OR 'complementary medicine' OR 'herb*' OR 'decoction*' OR 'botanic*' | 31075      |
| #7 | (#1 OR #2 OR #3) AND (#4 OR #5) AND (#6 OR #7)                                                                                                                                                                        | <b>621</b> |

## OASIS

|    | Searches                          | Results |
|----|-----------------------------------|---------|
| #1 | (뇌졸중 OR 중풍) AND (불면 OR 수면) AND 한약 | 2       |

## KISS

|    | Searches                          | Results |
|----|-----------------------------------|---------|
| #1 | (뇌졸중 OR 중풍) AND (불면 OR 수면) AND 한약 | 2       |

## RISS

|    | Searches                          | Results |
|----|-----------------------------------|---------|
| #1 | (뇌졸중 OR 중풍) AND (불면 OR 수면) AND 한약 | 1       |

## KMbase

|    | Searches                          | Results |
|----|-----------------------------------|---------|
| #1 | (뇌졸중 OR 중풍) AND (불면 OR 수면) AND 한약 | 1       |

## KCI

|    | Searches                          | Results |
|----|-----------------------------------|---------|
| #1 | (뇌졸중 OR 중풍) AND (불면 OR 수면) AND 한약 | 0       |

## CNKI

|    | Searches                                                                                                                        | Results |
|----|---------------------------------------------------------------------------------------------------------------------------------|---------|
| #1 | (SU='中风'+ '脑卒中') AND (SU='失眠'+ '不寐'+ '不眠'+ '不睡'+ '不得眠'+ '不得卧') AND (SU='中药'+ '中医药'+ '本草'+ '汤'+ '丸'+ '散'+ '方'+ '颗粒'+ '胶囊'+ '自拟') | 381     |

## Wanfang data

|    | Searches                                                                                                         | Results |
|----|------------------------------------------------------------------------------------------------------------------|---------|
| #1 | (中风 OR 脑卒中) AND (失眠 OR 不寐 OR 不眠 OR 不睡 OR 不得眠 OR 不得卧) AND (中药 OR 中医药 OR 本草 OR 汤 OR 丸 OR 散 OR 方 OR 颗粒 OR 胶囊 OR 自拟) | 2297    |

## VIP

|    | Searches                                                                                                               | Results |
|----|------------------------------------------------------------------------------------------------------------------------|---------|
| #1 | M=(中风 OR 脑卒中) AND M=(失眠 OR 不寐 OR 不眠 OR 不睡 OR 不得眠 OR 不得卧) AND M=(中药 OR 中医药 OR 本草 OR 汤 OR 丸 OR 散 OR 方 OR 颗粒 OR 胶囊 OR 自拟) | 131     |

|  |            |  |
|--|------------|--|
|  | * M=题名或关键词 |  |
|--|------------|--|

# CiNii

|    | Searches                                                                                                                                                                                                                                                                                                                                                                           | Results |
|----|------------------------------------------------------------------------------------------------------------------------------------------------------------------------------------------------------------------------------------------------------------------------------------------------------------------------------------------------------------------------------------|---------|
| #1 | (stroke OR "stroke" OR 中風 OR 脳卒中) AND (Sleep OR insomnia* OR wakeful* OR sleepless* OR dyssomn* OR 不眠 OR ふみん OR インソムニア OR ねぶそく) AND (“traditional Korean medicine” OR “traditional Chinese medicine” OR “Traditional oriental medicine” OR “Kampo medicine” OR “alternative medicine” OR “complementary medicine” OR herb* OR decoction* OR botanic* OR 漢方薬 OR ハーブ OR 散 OR 湯 OR 丸) | 8       |
