# Supplementary material for: Traditional East Asian Herbal Medicine for Post-Stroke Insomnia: A Systematic Review and Meta-Analysis of Randomized Controlled Trials
Source: MDPI journal article supplement (doi:10.3390/ijerph19031754), 2022-02-03
Supplement: s1 [file s1]

(A) excluding studies with high ROB

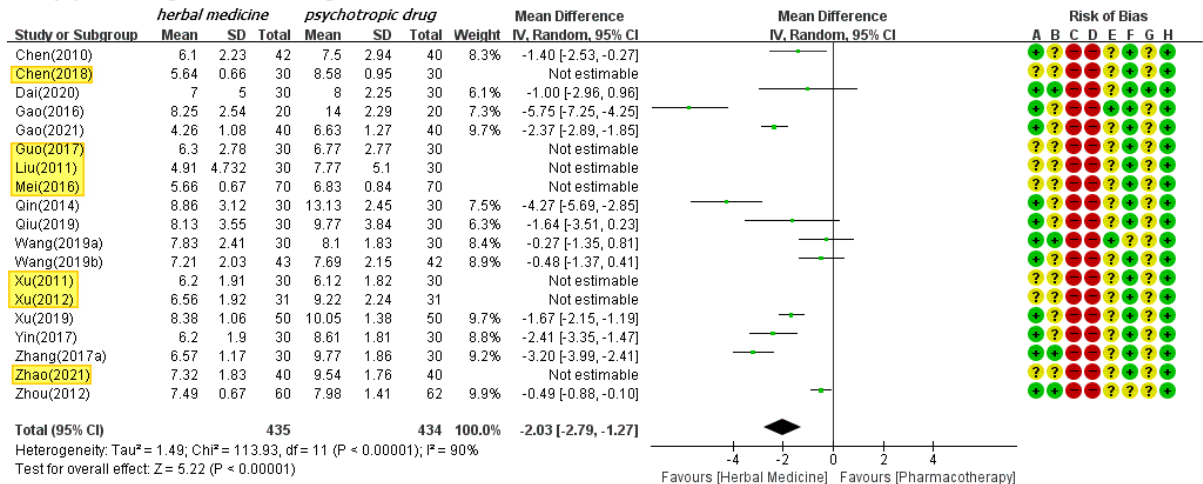

(B) excluding outlier that were numerically distant from the rest data

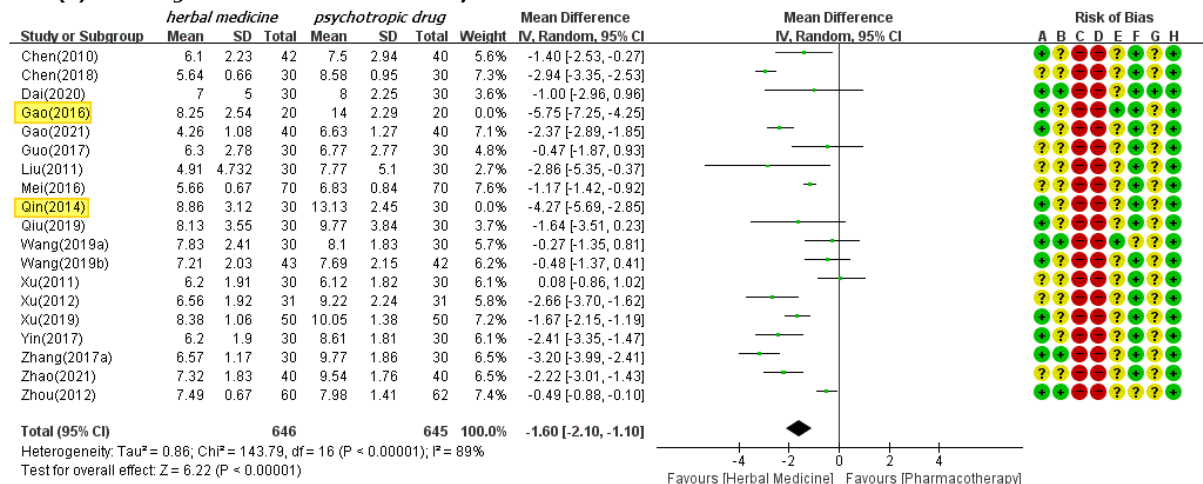

Figure S1. Forest plots for comparison of PSQI between herbal medicine and psychotropic drug groups. Sensitivity analysis after (A) excluding studies with high ROB and (B) excluding outlier that were numerically distant from the rest data
