# Supplementary material for: Traditional East Asian Herbal Medicine for Post-Stroke Insomnia: A Systematic Review and Meta-Analysis of Randomized Controlled Trials
Source: MDPI journal article supplement (doi:10.3390/ijerph19031754), 2022-02-03
Supplement: s1 [file s1]

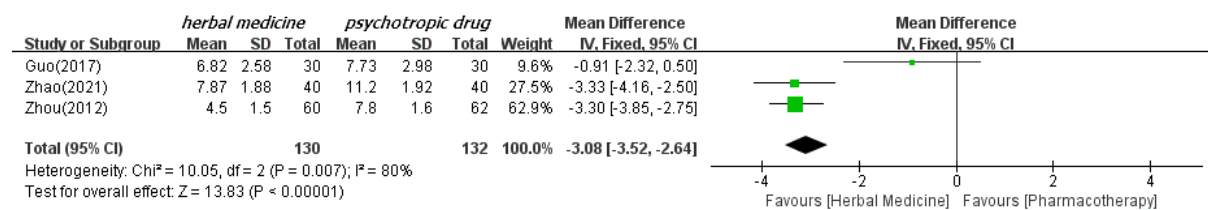

Figure S3. Forest plots for comparison of PSQI between herbal medicine and psychotropic drug groups in the follow-up studies.
