# Supplementary material for: Traditional East Asian Herbal Medicine for Post-Stroke Insomnia: A Systematic Review and Meta-Analysis of Randomized Controlled Trials
Source: MDPI journal article supplement (doi:10.3390/ijerph19031754), 2022-02-03
Supplement: s1 [file s1]

Table S5. Frequencies of usage of single herb in HM prescriptions

| Name of single herb           | frequency |
|-------------------------------|-----------|
| Zizyphi Spinosae Semen        | 11        |
| Glycyrrhizae Radix            | 9         |
| Rhizoma Salviae Miltiorrhizae | 9         |
| Poria(Hoelen)                 | 8         |
| Acori Graminei Rhizoma        | 8         |
| Ligustici Rhizoma             | 8         |
| Bupleuri Radix                | 7         |
| Polygoni Multiflori Ramuls    | 7         |
| Paeoniae Radix Alba           | 6         |
| Bovis Ossis Fossilia          | 6         |
| Paeoniae Radix Rubra          | 6         |
| Aurantii Immaturus Fructus    | 6         |
| Persicae Semen                | 5         |
| Ophiopogonis Radix            | 5         |
| Ostreae Concha                | 5         |
| Pinelliae Rhizoma             | 5         |
| Corni Fructus                 | 5         |
| Rehmanniae Radix Siccus       | 5         |
| Rehmanniae Radix Preparat     | 5         |
| Achyranthis Radix             | 5         |
| Lycii Fructus                 | 4         |
| Polygalae Radix               | 4         |
| Bambusae Caulis In Taeniam    | 4         |
| Cristariae Concha             | 4         |
| Flos Albiziae                 | 4         |
| Carthami Flo                  | 4         |
| Puerariae Radi                | 3         |
| Angelicae Gigantis Radix      | 3         |
| Codonopsis Pilosulae Radix    | 3         |
| Jujubae Fructus               | 3         |
| Allolobophora Corpus          | 3         |
| Albizziae Cortex              | 3         |

Note. We included single herb used more than 3 times in the Table.
