# Supplementary material for: Traditional East Asian Herbal Medicine for Post-Stroke Insomnia: A Systematic Review and Meta-Analysis of Randomized Controlled Trials
Source: MDPI journal article supplement (doi:10.3390/ijerph19031754), 2022-02-03
Supplement: s1 [file s1]

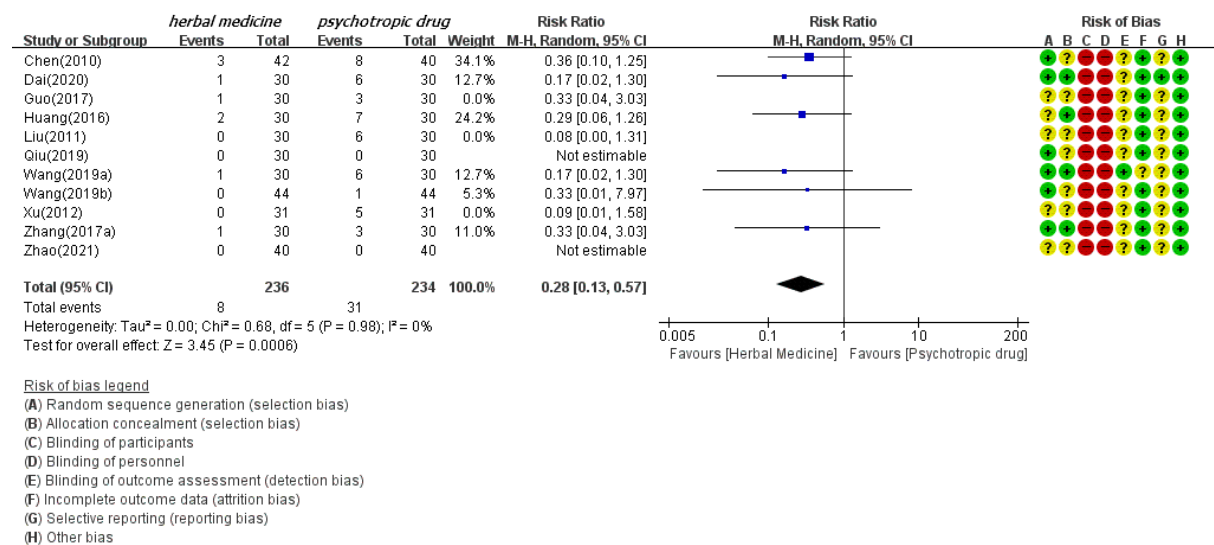

Figure S4. Forest plots for comparison of AE between herbal medicine and psychotropic drug groups. Sensitivity analysis after excluding studies with high ROB.
